# Supplementary material for: Bimetallic Au–Pd alloy nanoparticles supported on MIL-101(Cr) as highly efficient catalysts for selective hydrogenation of 1,3-butadiene
Source: Royal Society of Chemistry journal article supplement (doi:10.1039/d0ra06432g), 2020-01-01
Supplement: d0ra06432g1.pdf [file d0ra06432g1.pdf]

## Supporting Information

### Bimetallic Au–Pd Alloy Nanoparticles Supported on MIL-101(Cr) as Highly Efficient Catalysts for Selective Hydrogenation of 1,3-Butadiene

Lili Liu,\* Xiaojing Zhou, Luxia Guo, Shijuan Yan, Yingjie Li, Shuai Jiang, and Xishi Tai\*

**Table S1** Au and Pd loadings of as-synthesized catalysts from ICP-AES analysis.

| Entry | Catalyst               | $w_{\text{Au}}$<br>(%) | $w_{\text{Pd}}$<br>(%) | Mole ratio<br>(Au:Pd) |
|-------|------------------------|------------------------|------------------------|-----------------------|
| 1     | Au(3)Pd(1)/MIL-101(Cr) | 2.30                   | 0.40                   | 3:1                   |
| 2     | Au(2)Pd(1)/MIL-101(Cr) | 2.03                   | 0.58                   | 2:1                   |
| 3     | Au(1)Pd(2)/MIL-101(Cr) | 1.25                   | 1.35                   | 1:2                   |
| 4     | Au(1)Pd(3)/MIL-101(Cr) | 1.00                   | 1.60                   | 1:3                   |
| 5     | Au/MIL-101(Cr)         | 2.55                   | –                      | –                     |
| 6     | Pd/MIL-101(Cr)         | –                      | 2.66                   | –                     |

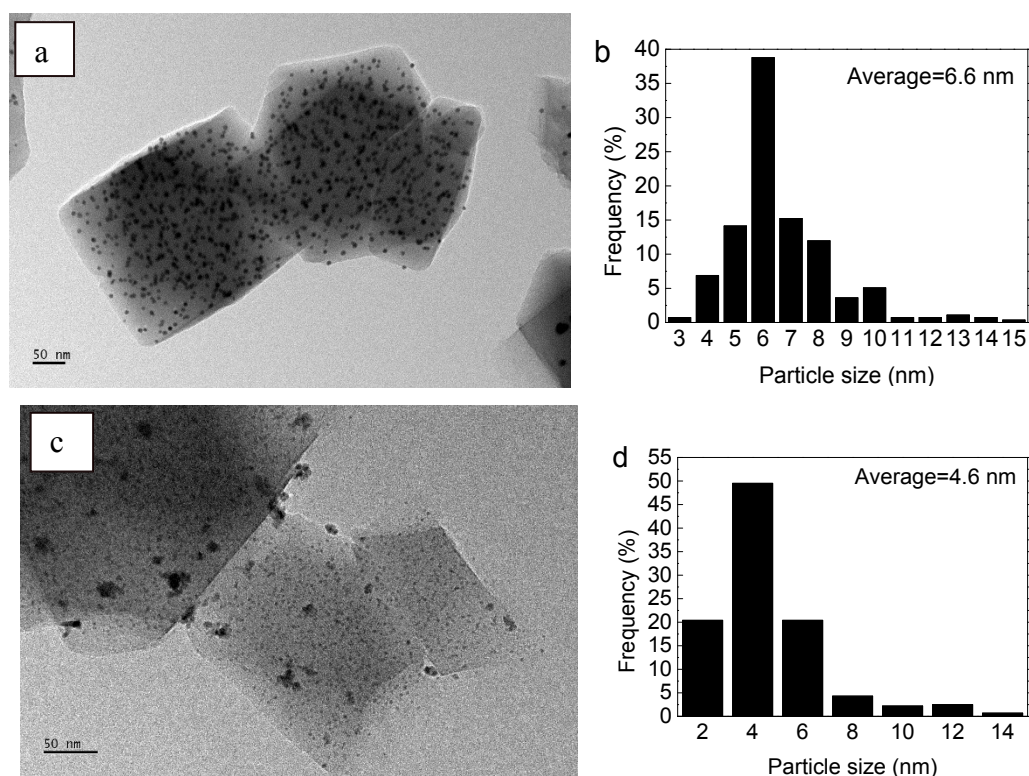

**Fig. S1** TEM micrographs and particle size distribution histograms of Au/MIL-101(Cr) (a, b) and Pd/MIL-101(Cr) (c, d).

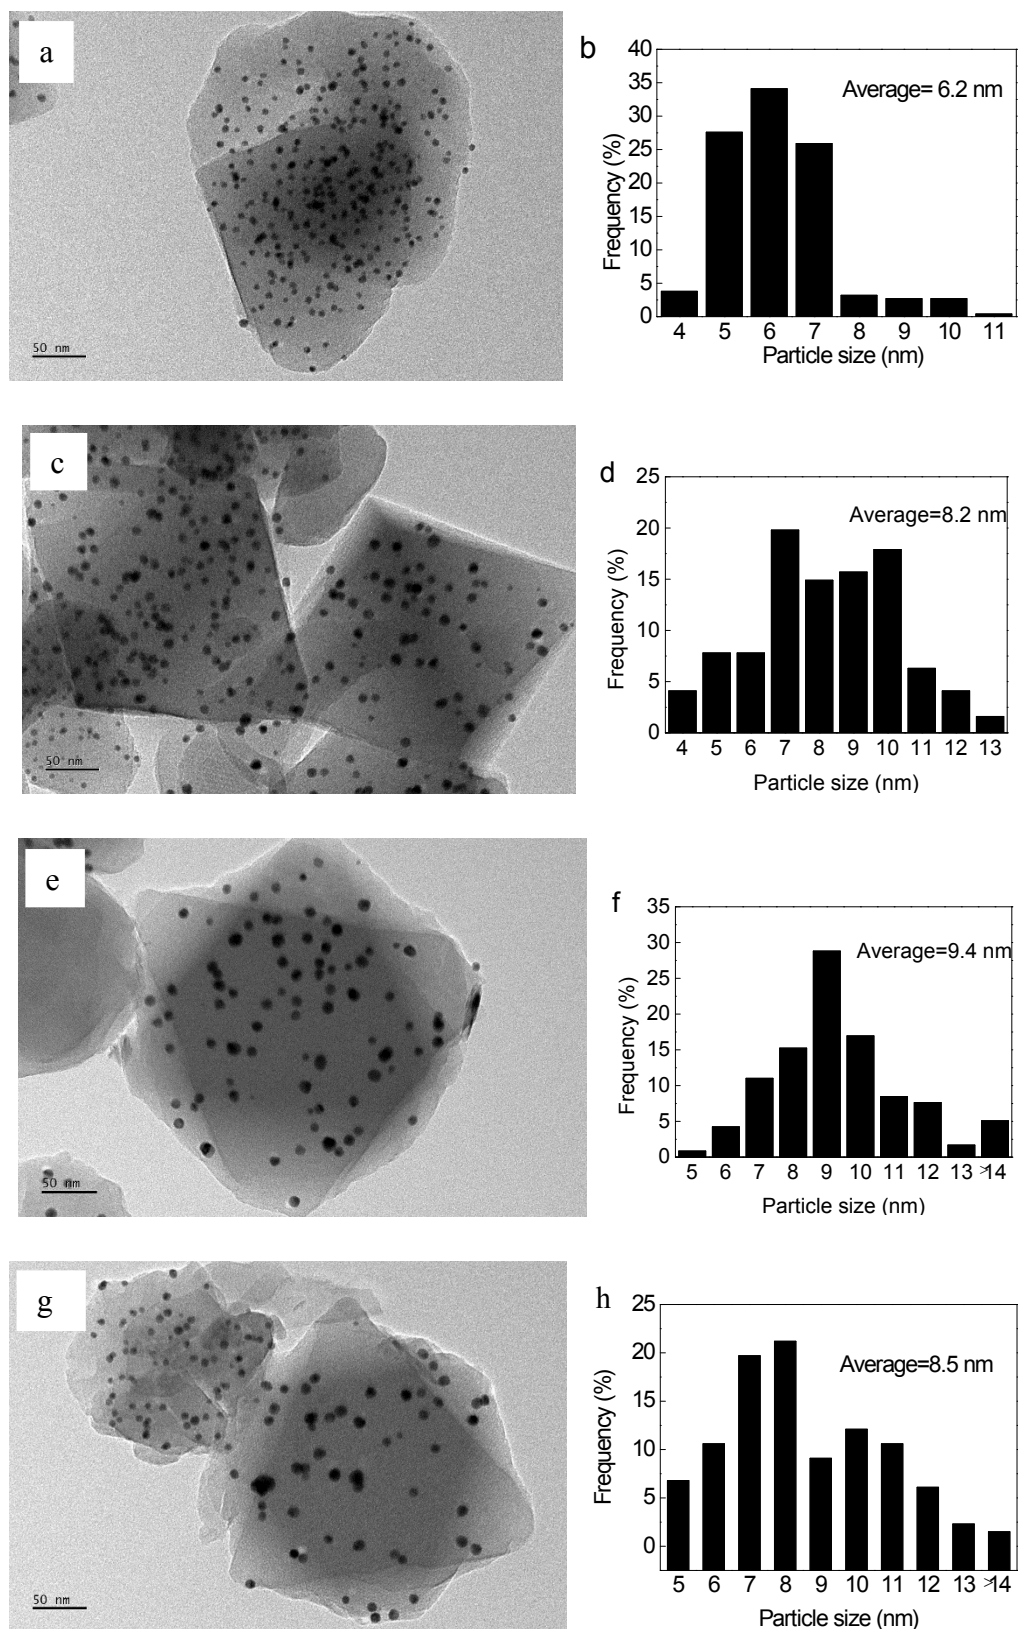

**Fig. S2** TEM micrographs and the particle size distribution histograms of Au(2)Pd(1)/MIL-101(Cr): (a, b) pretreatment in flowing N<sub>2</sub> at 50 °C for 1 h; (c, d) pretreatment in flowing N<sub>2</sub> at 80 °C for 1 h; (e, f) pretreatment in flowing N<sub>2</sub> at 100 °C for 1 h; (g, h) pretreatment in flowing H<sub>2</sub> at 50 °C for 1 h.

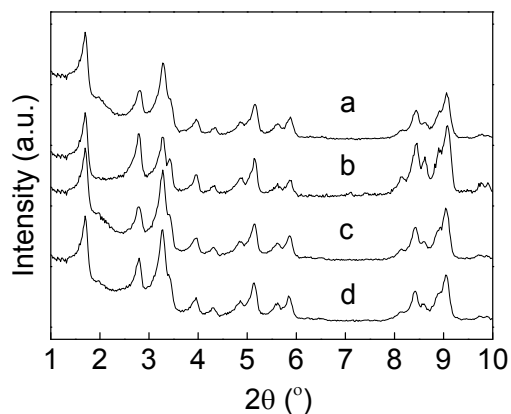

**Fig. S3** XRD patterns of Au(2)Pd(1)/MIL-101(Cr): (a) pretreatment in flowing  $N_2$  at 50 °C for 1 h; (b) pretreatment in flowing  $N_2$  at 80 °C for 1 h; (c) pretreatment in flowing  $N_2$  at 100 °C for 1 h; (d) pretreatment in flowing  $H_2$  at 50 °C for 1 h.

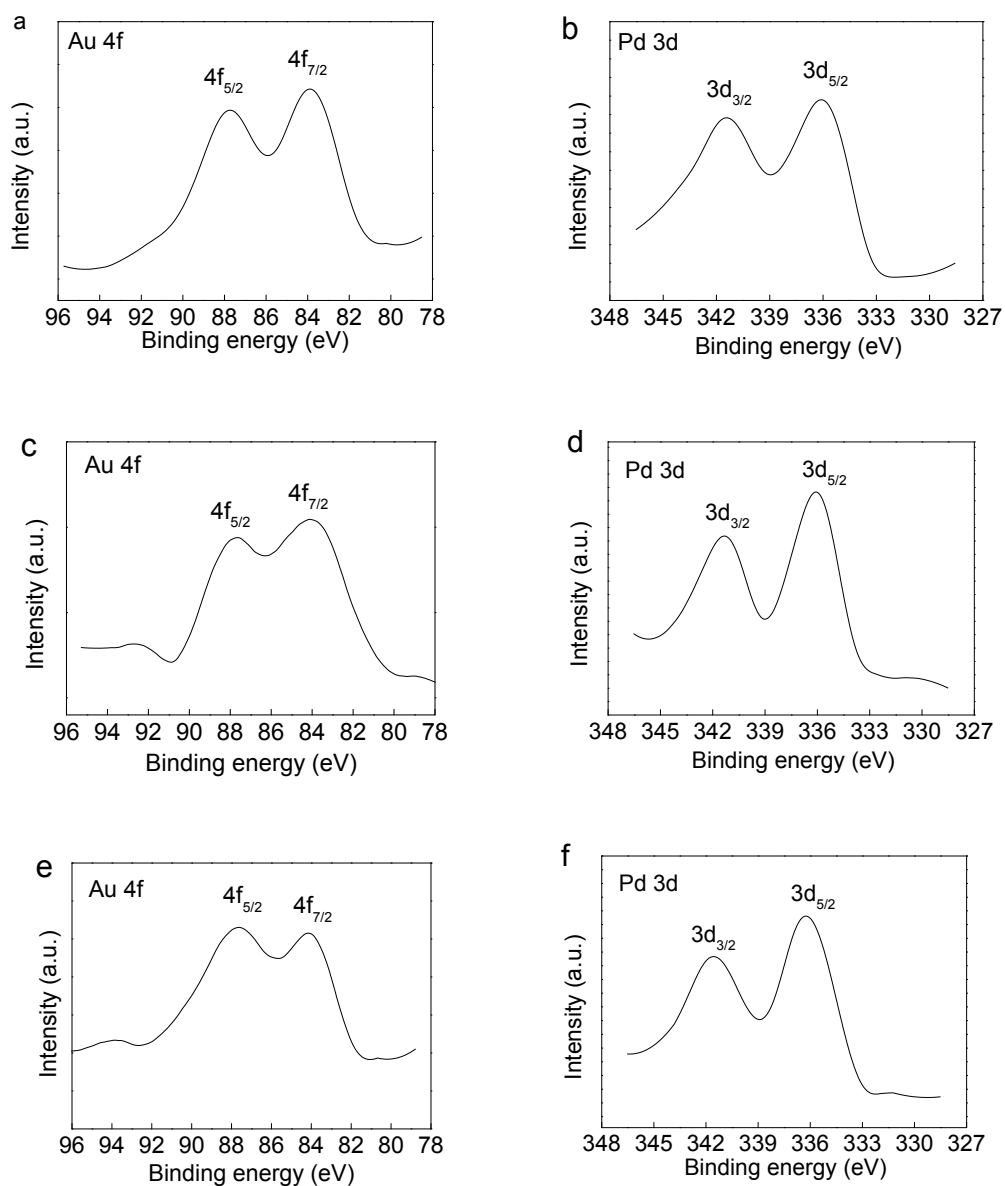

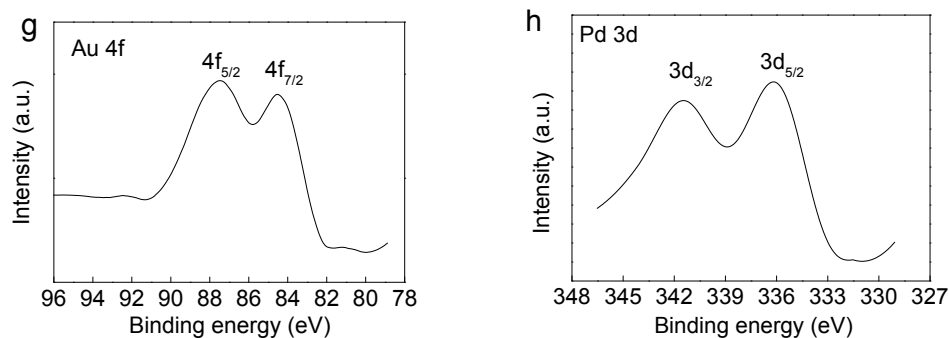

**Fig. S4** Au 4f and Pd 3d XPS of Au(2)Pd(1)/MIL-101(Cr): (a,b) pretreatment in flowing  $N_2$  at 50 °C for 1 h; (c, d) pretreatment in flowing  $N_2$  at 80 °C for 1 h; (e, f) pretreatment in flowing  $N_2$  at 100 °C for 1 h; (g, h) pretreatment in flowing  $H_2$  at 50 °C for 1 h.

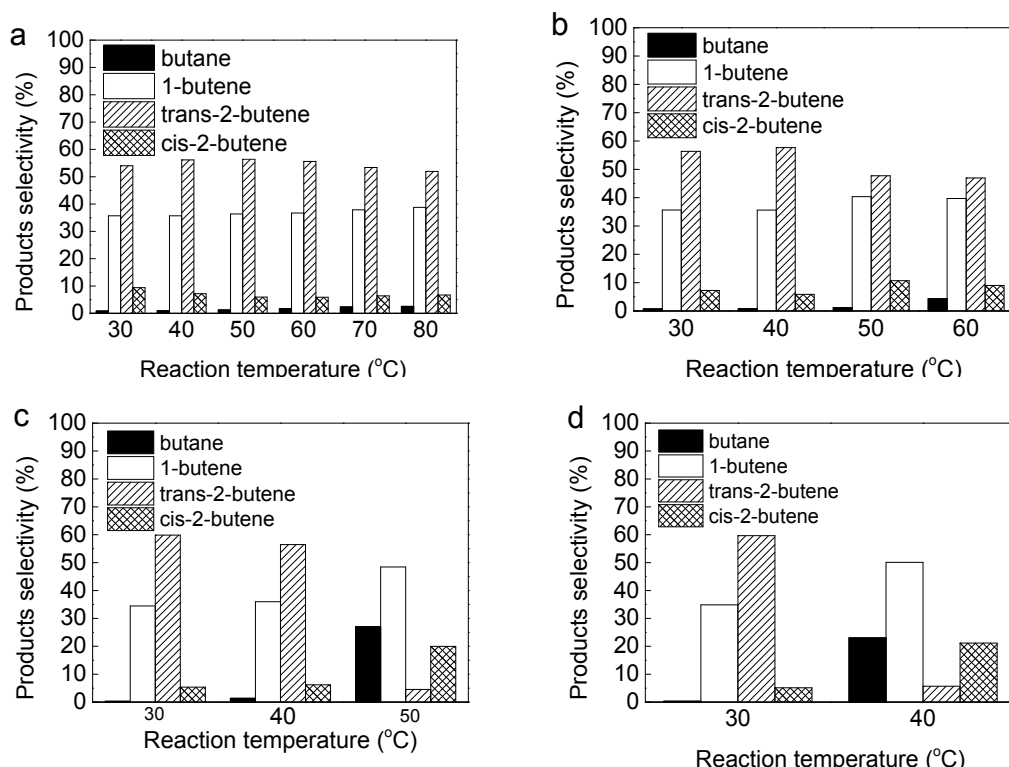

**Fig. S5** The product selectivities over Au-Pd bimetallic catalysts with different Au:Pd mole ratio: (a) Au(3)Pd(1)/MIL-101(Cr); (b) Au(2)Pd(1)/MIL-101(Cr); (c) Au(1)Pd(2)/MIL-101(Cr); (d) Au(1)Pd(3)/MIL-101(Cr) (the catalysts were pretreated in flowing  $N_2$  at 50 °C for 1 h before reaction). (supporting information, page 4)

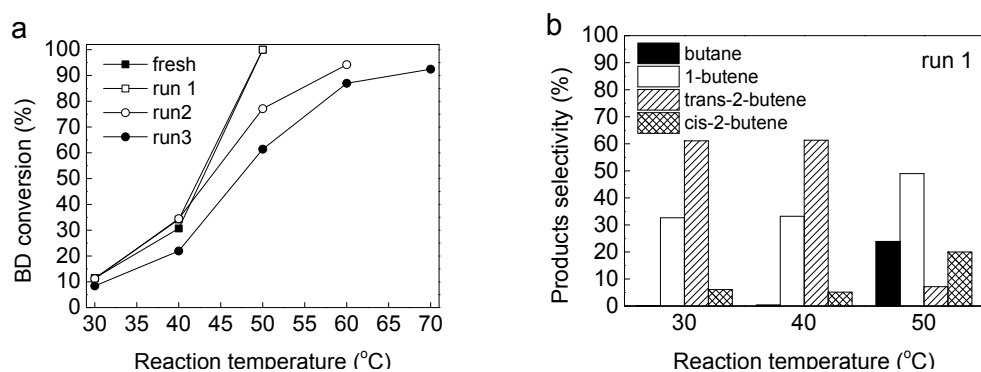

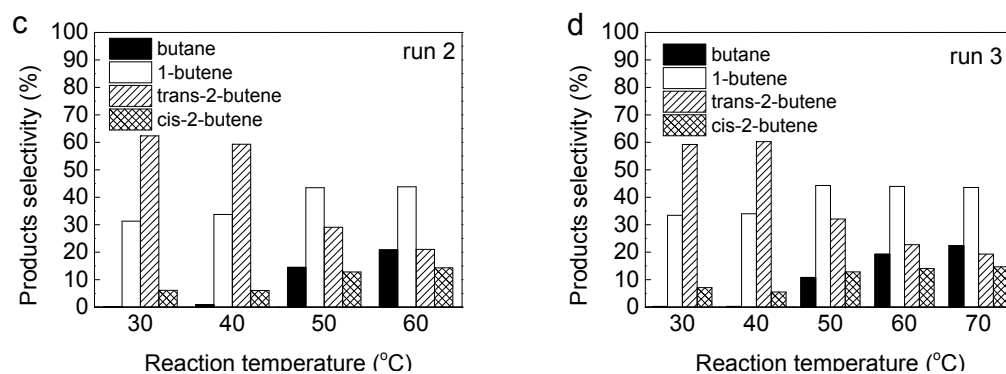

**Fig. S6** The reusability of Pd/MIL-101(Cr): (a) BD conversion; (b–d) Product selectivity.

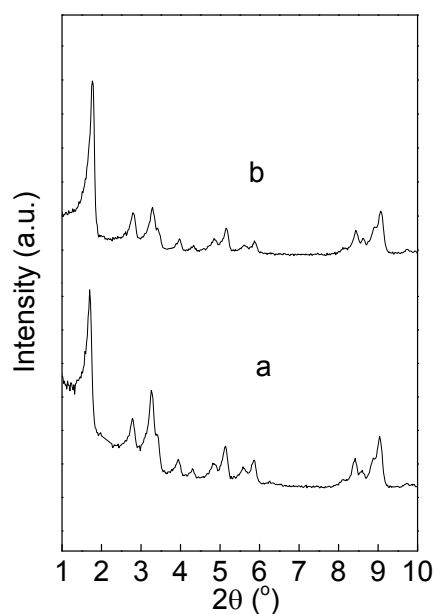

**Fig. S7** XRD patterns of as-prepared (a) and reused Au(2)Pd(1)/MIL-101(Cr) (b).

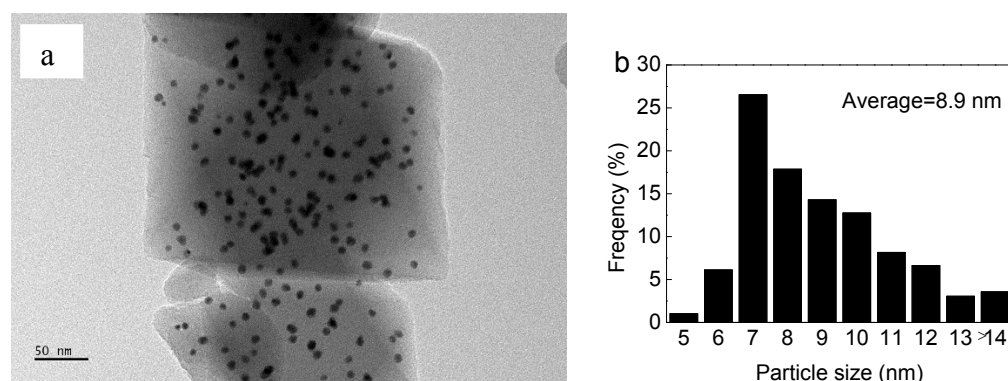

**Fig. S8** TEM micrograph (a) and the Au–Pd particle size distribution histograms (b) of reused Au(2)Pd(1)/MIL-101(Cr).
